# Supplementary material
Source: PubMed Central journal article supplement (PMC6317285)
Supplement: supplementarymaterials151020final.pdf [file supplementarymaterials151020final.pdf]

1 **Supplementary Materials**

2 ***Intrinsic physiological properties of layer 2/3 somatosensory cortical***  
3 ***neurons in vivo***

4 We recorded a total of 41 cells from layer 2/3 somatosensory cortex  
5 (hindpaw region) from 41 mice. Mean RMP for neurons undergoing CSD was -  
6  $59.55 \pm 1.76$  mV: this is within the range of what has been reported for layer 2/3  
7 *in vivo*: -60.3 (Chung et al. 2002; layers 2/3-4), -58.6 mV (Mateo et al. 2011;  
8 layer 2/3), -60 mV (Ferster and Jagadeesh 1992; layers 1-5), 66.0 (Zhu and  
9 Connors 1999; layers 2-5), -50 to -80 mV (Tan et al. 2011; layers 2-4), -65 and -  
10 77 mV (Wilent and Contreras 2004; layers 2-6), -78.9 (Kitamura et al. 2008; layer  
11 2/3).

12

13 Principal neurons were classified as cells exhibiting regular spiking (RS)  
14 or intrinsically bursting (IB) phenotypes (Connors et al. 1982; McCormick et al.  
15 1985; Connors and Gutnick 1990; Nunez et al. 1993; Zhu and Connors 1999;  
16 Nowak et al. 2003; Supplementary Fig. 1A). Most of the neurons (20/28; 71%)  
17 exhibited regular spiking firing: cells fired a single AP to depolarizing current  
18 pulses, with increased firing frequency to increasing current, but frequency was  
19 always less than 100 Hz. Spontaneous recordings showed predominantly single  
20 APs, though double action potentials were occasionally seen (5% of cells;  
21 Supplementary Fig. 1B left). RS cells exhibited broad action potentials: half-width  
22  $1.92 \pm 0.13$  ms. The interspike interval (ISI) histogram for RS neurons was  
23 symmetrical, with an refractory period of 5.6 ms (Supplementary Fig. 1C left).

24

25 The remainder of principal neurons had an IB phenotype (8/28; 29%). In  
26 these cells, bursts were seen at rest (Supplementary Fig. 1B middle) and at

27 lower current injections (Supplementary Fig. 1A middle); increasing current  
28 intensity changed the firing pattern from IB to RS-like firing without a burst (Wang  
29 and McCormick 1993; Timofeev et al. 2000). Bursts consisted of more than three  
30 action potentials, with firing frequency more than 100 Hz. Half-width of AP's for  
31 IB cells was  $2.4 \pm 0.2$  ms. The interspike interval histogram for IB cells showed a  
32 skewed distribution with shorter refractory period of 2 ms (Supplementary Fig. 1C  
33 middle), which suggested an increased probability of action potential firing for  
34 these bursting neurons. We concluded that our normative data from  
35 somatosensory cortex pyramidal cells *in vivo* was consistent with RS and IB  
36 pyramidal neuron characteristics reported *in vivo* (Nunez et al. 1993; Zhu and  
37 Connors 1999; Nowak et al. 2003).

38

39         Less frequently we encountered cells with interneuronal characteristics (n  
40 = 3 cells, n = 3 animals) from the same recording locations (layer 2/3, hindpaw  
41 somatosensory cortex) as principal cells, using blind patch technique. These  
42 cells displayed average resting membrane voltage of  $-64.42 \pm 1.07$  mV and input  
43 resistance of  $154.3 \pm 2.53$ . The half-duration of their action potentials was shorter  
44 than observed for RS and IB cells, ranging from varied from 1.12 to 1.82 ms, with  
45 a mean of  $1.56 \pm 0.02$  ms. Interneurons were able to fire at higher frequencies  
46 than excitatory neurons (Supplementary Fig. 1A right) in response to increasing  
47 amplitudes of depolarizing current (>100Hz). Spontaneously interneurons were  
48 able to fire double or triple APs (Supplementary Fig. 1B right). The refractory  
49 period for interneurons was 4.4 ms and displaced toward lower values in  
50 comparison to the RS cells (Supplementary Fig. 1C right). Because of the low  
51 number of cells, interneurons were not analyzed for the effects of CSD.

52

53 To confirm the identity and layer 2/3 location of our recorded cells, we  
54 performed additional experiments using two-photon microscopy-guided  
55 recordings (Sutter Movable Objective Microscope with 2 Hamamatsu R6357  
56 photomultiplier tubes; Zeiss 5X/0.27NA, 20X/1.0NA and 40X/1.0NA water  
57 immersion objectives; Spectra Physics MaiTai Ti:Sapphire laser, pulse width  
58  $\approx$ 100 fs, excitation 750-950 nm, emission 535/50 nm (green; GCaMP and GFP  
59 fluorescence); 617/75 nm (red; Alexa 594 fluorescence)). The patch pipette was  
60 visualized by adding the red dye Alexa594 (50  $\mu$ M) to the internal solution.  
61 Anesthesia and experimental setup otherwise identical to Methods.

62

63 We used viral delivery of GCaMP5G (Akerboom et al. 2012;  
64 AAV2/1.hSynap.GCaMP5G.WPRE.SV40; Penn Vector Core), injected (typically  
65 0.5 $\mu$ L) through a 1mm burrhole in the somatosensory cortex two weeks prior to  
66 recording (S1; 2.5 mm lateral to bregma, 200 $\mu$ m depth to trigger layer II/III  
67 expression) to allow visualization of all neurons. In these experiments all cells  
68 recorded had a RS phenotype (n = 6 cells, 6 animals). Layer 2/3 location was  
69 confirmed by distance measured from pia; principal cell anatomy was confirmed  
70 by imaging (Figure 2). We used GAD67-GFP ( $\Delta$ neo) animals (n = 4 cells, 4  
71 animals; Tamamaki et al. 2003), expressing green fluorescent protein under the  
72 GAD67 promoter, to identify interneurons. Consistent with other reports  
73 (Tamamaki et al. 2003; Sohya et al. 2007), there was sparse GFP labeling, as  
74 expected for a GABAergic population (Markram et al. 2004). Morphology of the  
75 neurons was also consistent with interneurons (Kawabata et al. 2012). All  
76 recordings from GFP-expressing cells had an interneuronal electrophysiological  
77 phenotype (Margrie et al. 2003; Avermann et al. 2012) (Supplementary Fig. 2).



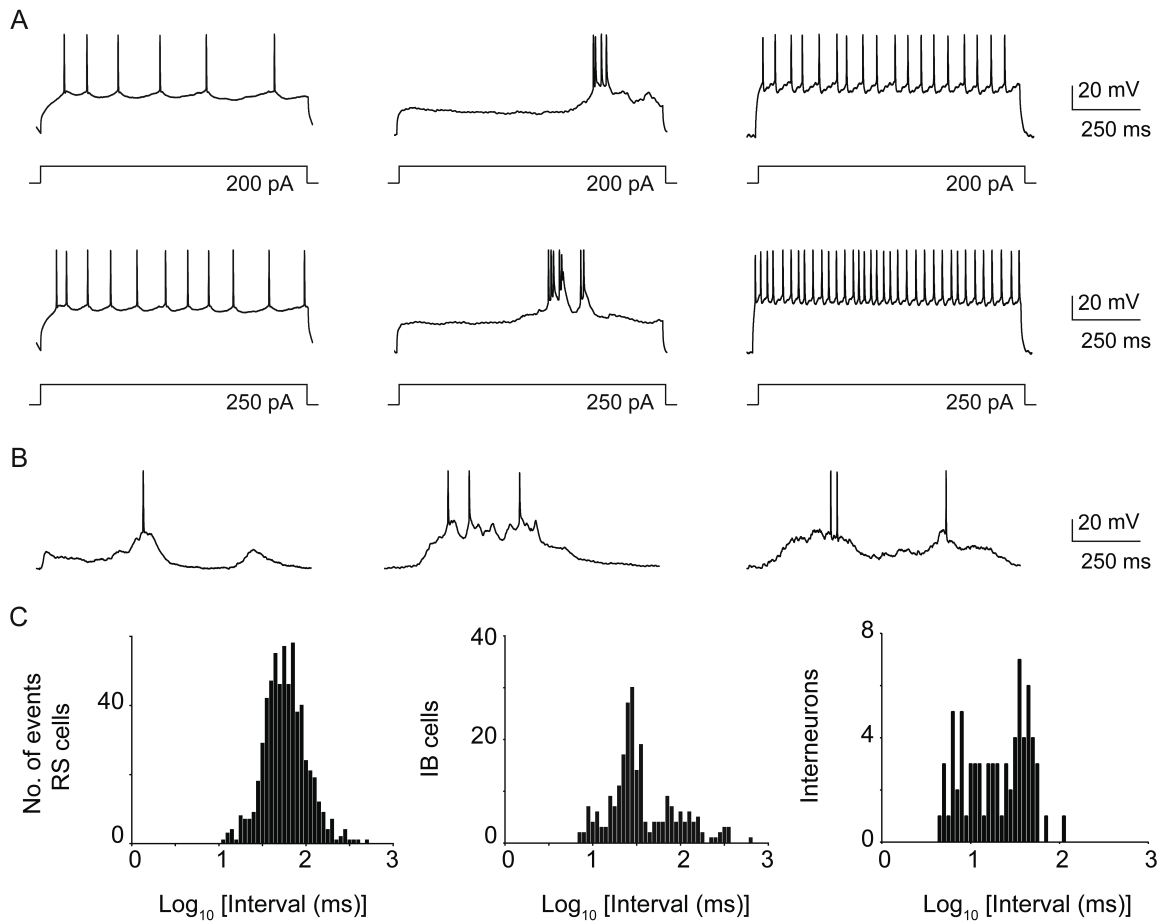

80

81 **Supplementary Figure 1. *In vivo* whole cell recording in layer 2/3 pyramidal**82 **cells and interneurons of sensory cortex: spontaneous and evoked**83 **responses of regular-spiking (RS), intrinsically burst-spiking (IB) neurons,**84 **and interneurons. (A) Firing profile to depolarizing current pulses of two**85 **different current intensities. Action potentials trimmed for clarity. (B) Voltage**86 **traces showing spontaneously occurring events. APs trimmed for clarity. (C)**87 **Inter-spike interval histograms for RS neurons (left), IB neurons (middle), and**88 **interneurons (right) – note the skewed histogram for IB neurons, which reflects**89 **burst firing pattern.**

90

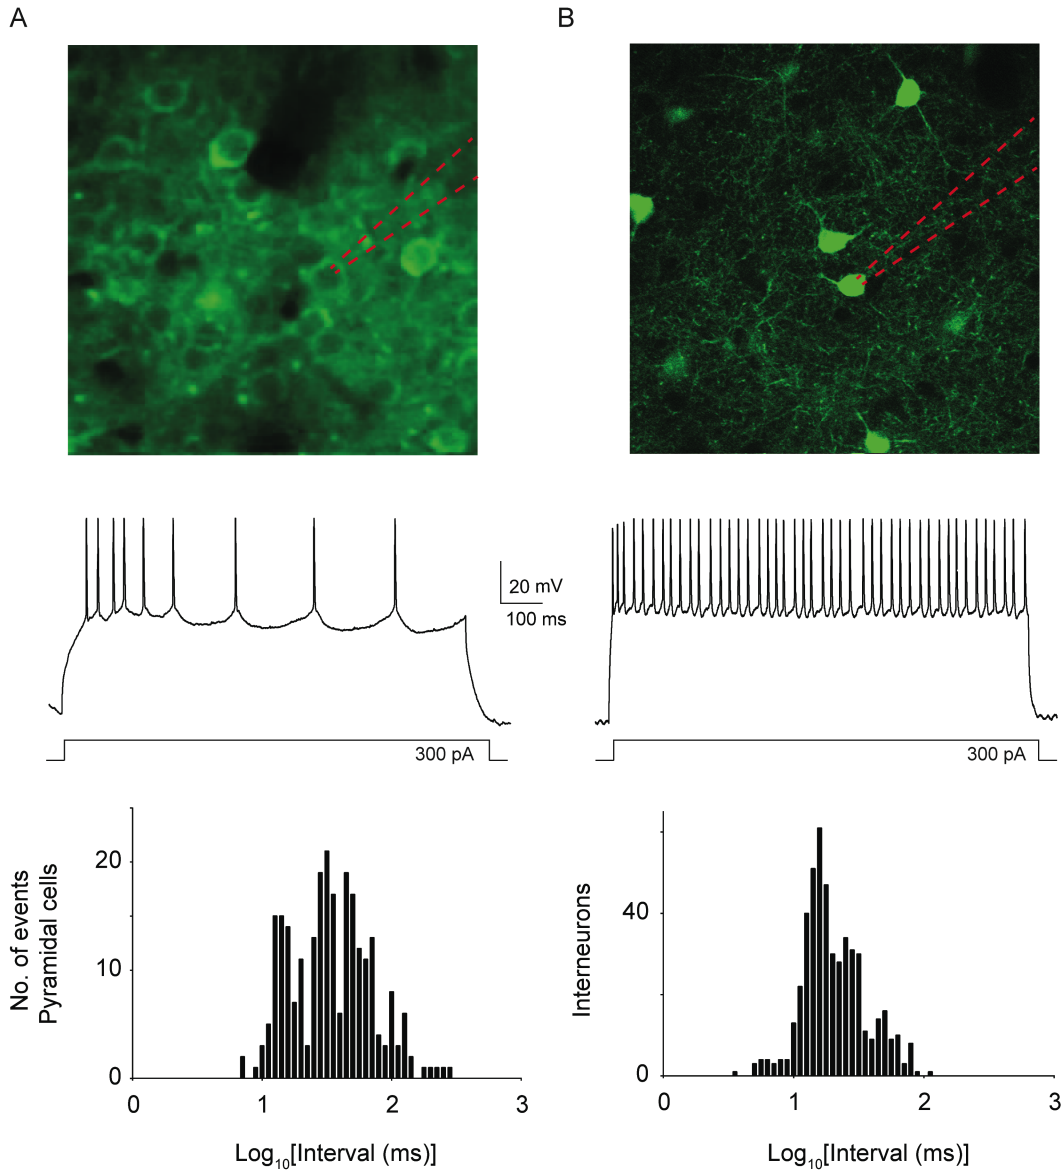

91

92 **Supplementary Figure 2.** A) Image shows neurons expressing GCaMP5  
 93 genetically encoded calcium indicator, virally delivered under the synapsin1  
 94 promoter, which confers expression in all neurons. Outline of patch pipette in red.  
 95 Trace shows current clamp recording revealing RS firing pattern on current  
 96 injection and interspike interval histogram consistent with pyramidal cell identity.  
 97 All cells recorded with synapsin1-GCaMP5 indicator were RS cells. (B) Two-  
 98 photon visualization GFP-positive interneuron, imaged from a GAD67-GFP

99 mouse. Trace shows fast spiking and histogram shows interspike interval

100 histogram consistent with interneuronal characteristics.

101

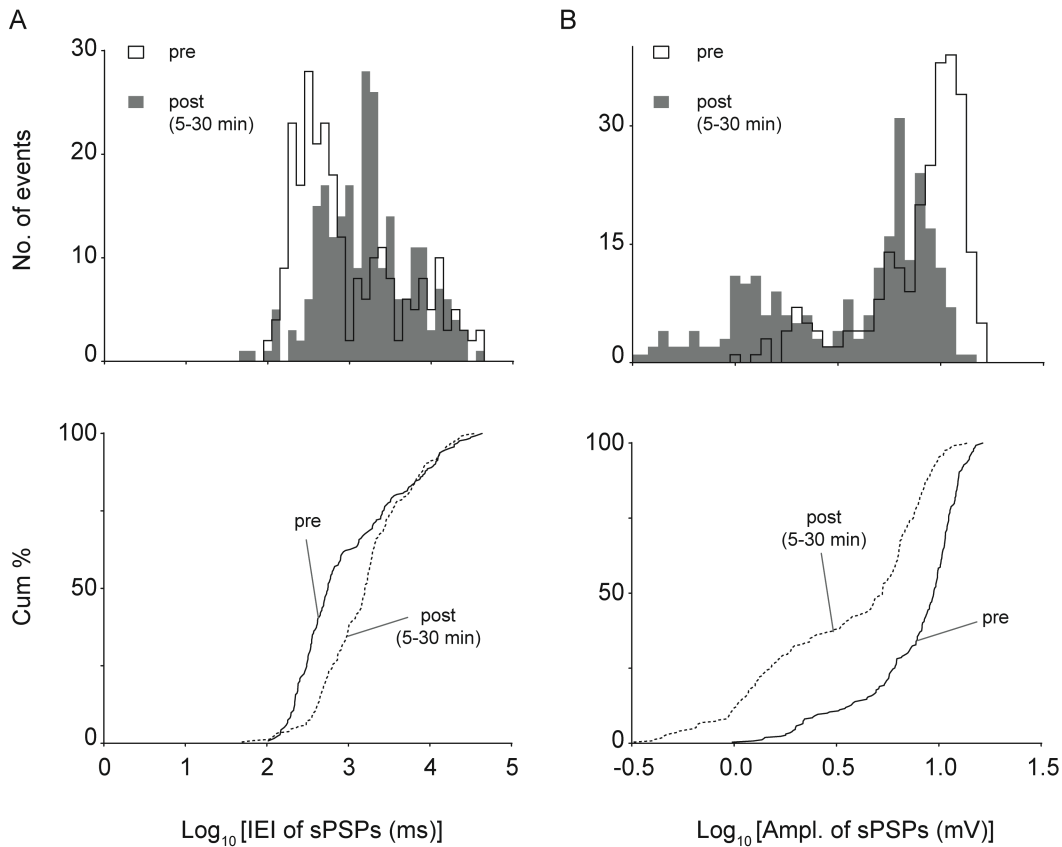

102

103 **Supplementary Figure 3. Reduced frequency and amplitude of sPSPs from**

104 **cells patched 5-30 min after CSD *in vivo*.** Similar to cells recorded

105 continuously through an CSD event, cells patched 5-30 min *after* CSD show

106 significant reductions in sPSP frequency (A) (KS test,  $p = 3.10 \cdot 10^{-11}$ ;  $n = 5$  cells,

107 5 mice) and amplitude ( $p = 1.98 \cdot 10^{-24}$ ) (B). These results provide evidence that

108 the reductions seen in continuous recordings are unlikely to be due to rundown.

109

110



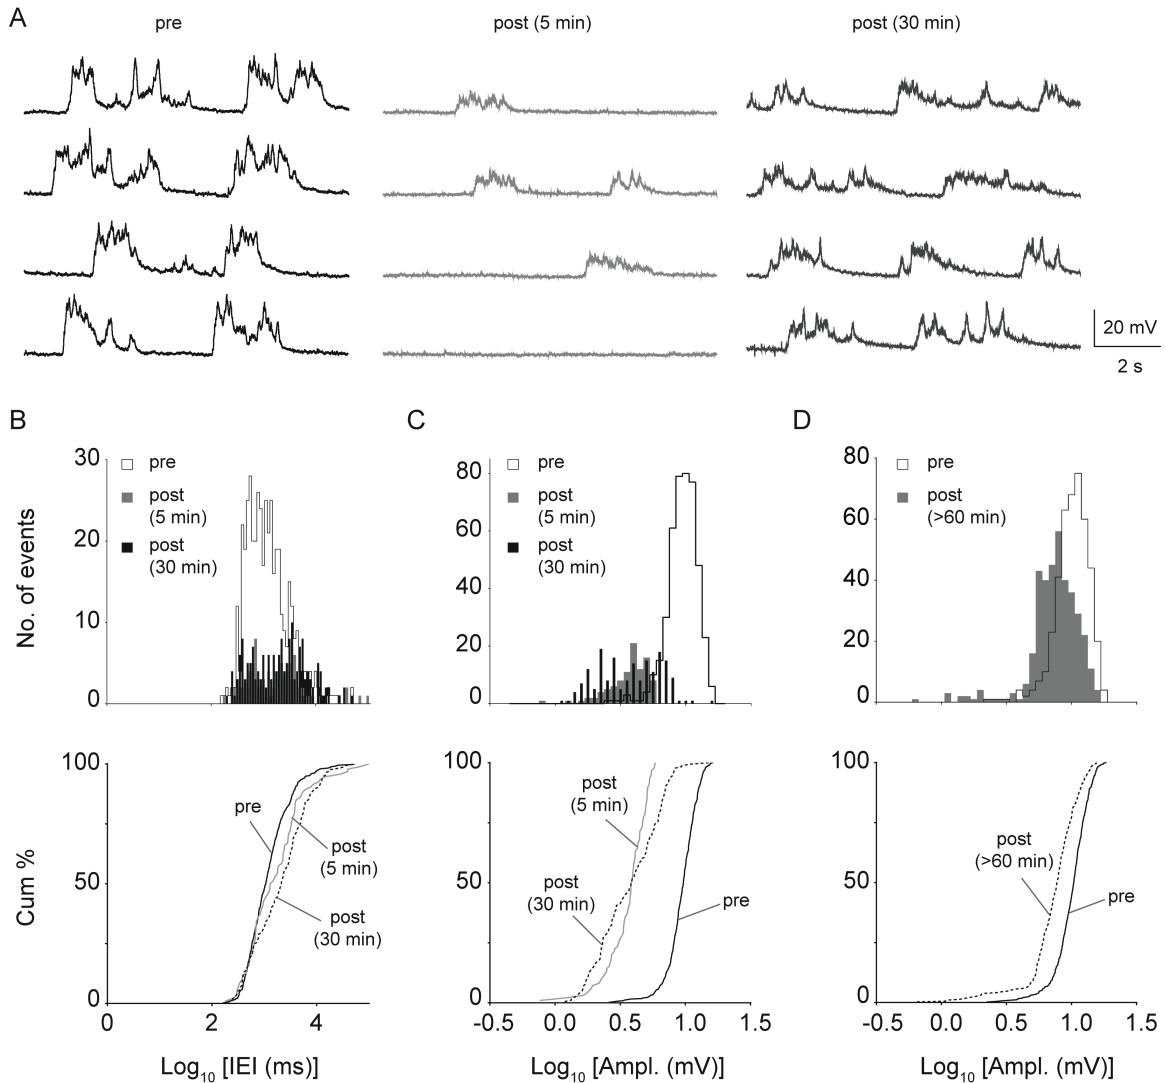

111

112 **Supplementary Figure 4. Reduction in membrane up-states after CSD in**

113 **vivo.** (A) Representative traces of upstates are shown from layer 2/3 pyramidal

114 neurons in pre-CSD and post-CSD groups. Slow oscillatory rhythms consisting of

115 depolarized potential (upstates) and hyperpolarized state (downstates) were

116 routinely observed before CSD. (B) Frequency of upstates is significantly

117 decreased both 5 and 30 min after CSD (5 min:  $p = 0.004$ ; 30 min:  $p = 4.91 \times 10^{-9}$ ;

118 2-sample KS test;  $n = 6$  cells, 6 mice). (C) Amplitude of upstates is also reduced

119 in both post-CSD groups (5 min:  $p = 1.78 \times 10^{-65}$ ; 30 min:  $p = 6.18 \times 10^{-71}$ ; KS test).

120 (D) Upstate amplitude remained lower >60 min after CSD ( $p = 1.34 \times 10^{-28}$ ; KS

121 test). By this time upstate frequency had recovered ( $p > 0.05$ , KS test; data not  
122 shown). As upstates require recurrent network activity, these data are evidence  
123 that CSD affects network function beyond the local synapse.

124

125

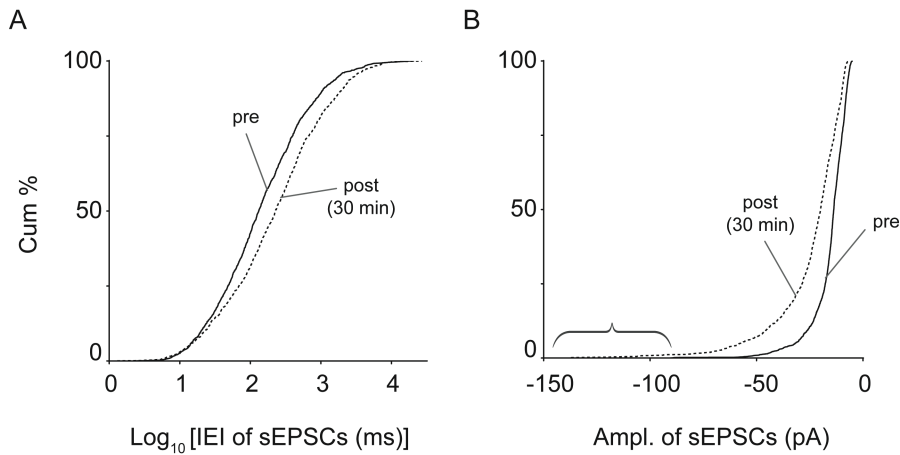

126

127 **Supplementary Figure 5. Reduced frequency and increased amplitude of**

128 **sEPSCs 30 min post-CSD *in vitro*, using potassium gluconate internal**

129 **solution.** Most *in vitro* recordings were performed in voltage clamp mode, using

130 cesium-containing internal solution. However recordings in current clamp using

131 potassium gluconate internal solution (identical to *in vivo* recordings) showed the

132 same phenotype of decreased frequency (A) (KS test,  $p = 3.53 \cdot 10^{-13}$ ;  $n = 6$  cells,

133 6 mice) and increased amplitude (B) of sEPSCs 30 min after CSD ( $p = 1.42 \cdot 10^{-$

134 <sup>85</sup>, KS test; bracket shows > 100 pA events).

135

136

137

138

139

140

141 **References**

142

143 Akerboom J, Chen TW, Wardill TJ, Tian L, Marvin JS, Mutlu S, Calderon NC, Esposti F,  
144 Borghuis BG, Sun XR, Gordus A, Orger MB, Portugues R, Engert F, Macklin JJ, Filosa  
145 A, Aggarwal A, Kerr RA, Takagi R, Kracun S, Shigetomi E, Khakh BS, Baier H, Lagnado  
146 L, Wang SS, Bargmann CI, Kimmel BE, Jayaraman V, Svoboda K, Kim DS, Schreier  
147 ER, Looger LL. 2012. Optimization of a GCaMP calcium indicator for neural activity  
148 imaging. *J Neurosci.* 32:13819-13840.

149 Avermann M, Tomm C, Mateo C, Gerstner W, Petersen CC. 2012. Microcircuits of  
150 excitatory and inhibitory neurons in layer 2/3 of mouse barrel cortex. *J Neurophysiol.*  
151 107:3116-3134.

152 Chung S, Li X, Nelson SB. 2002. Short-term depression at thalamocortical synapses  
153 contributes to rapid adaptation of cortical sensory responses in vivo. *Neuron.* 34:437-  
154 446.

155 Connors BW, Gutnick MJ. 1990. Intrinsic firing patterns of diverse neocortical neurons.  
156 *Trends Neurosci.* 13:99-104.

157 Connors BW, Gutnick MJ, Prince DA. 1982. Electrophysiological properties of  
158 neocortical neurons in vitro. *J Neurophysiol.* 48:1302-1320.

159 Ferster D, Jagadeesh B. 1992. EPSP-IPSP interactions in cat visual cortex studied with  
160 in vivo whole-cell patch recording. *J Neurosci.* 12:1262-1274.

161 Kawabata I, Kashiwagi Y, Obashi K, Ohkura M, Nakai J, Wynshaw-Boris A, Yanagawa  
162 Y, Okabe S. 2012. LIS1-dependent retrograde translocation of excitatory synapses in  
163 developing interneuron dendrites. *Nat Commun.* 3:722.

164 Kitamura K, Judkewitz B, Kano M, Denk W, Hausser M. 2008. Targeted patch-clamp  
165 recordings and single-cell electroporation of unlabeled neurons in vivo. *Nat Methods*.  
166 5:61-67.

167 Margrie TW, Meyer AH, Caputi A, Monyer H, Hasan MT, Schaefer AT, Denk W, Brecht  
168 M. 2003. Targeted whole-cell recordings in the mammalian brain in vivo. *Neuron*.  
169 39:911-918.

170 Markram H, Toledo-Rodriguez M, Wang Y, Gupta A, Silberberg G, Wu C. 2004.  
171 Interneurons of the neocortical inhibitory system. *Nat Rev Neurosci*. 5:793-807.

172 Mateo C, Avermann M, Gentet LJ, Zhang F, Deisseroth K, Petersen CC. 2011. In vivo  
173 optogenetic stimulation of neocortical excitatory neurons drives brain-state-dependent  
174 inhibition. *Curr Biol*. 21:1593-1602.

175 McCormick DA, Connors BW, Lighthall JW, Prince DA. 1985. Comparative  
176 electrophysiology of pyramidal and sparsely spiny stellate neurons of the neocortex. *J*  
177 *Neurophysiol*. 54:782-806.

178 Nowak LG, Azouz R, Sanchez-Vives MV, Gray CM, McCormick DA. 2003.  
179 Electrophysiological classes of cat primary visual cortical neurons in vivo as revealed by  
180 quantitative analyses. *J Neurophysiol*. 89:1541-1566.

181 Nunez A, Amzica F, Steriade M. 1993. Electrophysiology of cat association cortical cells  
182 in vivo: intrinsic properties and synaptic responses. *J Neurophysiol*. 70:418-430.

183 Sohya K, Kameyama K, Yanagawa Y, Obata K, Tsumoto T. 2007. GABAergic neurons  
184 are less selective to stimulus orientation than excitatory neurons in layer II/III of visual

185 cortex, as revealed by in vivo functional Ca<sup>2+</sup> imaging in transgenic mice. *J Neurosci.*  
186 27:2145-2149.

187 Tamamaki N, Yanagawa Y, Tomioka R, Miyazaki J, Obata K, Kaneko T. 2003. Green  
188 fluorescent protein expression and colocalization with calretinin, parvalbumin, and  
189 somatostatin in the GAD67-GFP knock-in mouse. *J Comp Neurol.* 467:60-79.

190 Tan AY, Brown BD, Scholl B, Mohanty D, Priebe NJ. 2011. Orientation selectivity of  
191 synaptic input to neurons in mouse and cat primary visual cortex. *J Neurosci.* 31:12339-  
192 12350.

193 Timofeev I, Grenier F, Steriade M. 2000. Impact of intrinsic properties and synaptic  
194 factors on the activity of neocortical networks in vivo. *J Physiol Paris.* 94:343-355.

195 Wang Z, McCormick DA. 1993. Control of firing mode of corticotectal and corticopontine  
196 layer V burst-generating neurons by norepinephrine, acetylcholine, and 1S,3R-ACPD. *J*  
197 *Neurosci.* 13:2199-2216.

198 Wilent WB, Contreras D. 2004. Synaptic responses to whisker deflections in rat barrel  
199 cortex as a function of cortical layer and stimulus intensity. *J Neurosci.* 24:3985-3998.

200 Zhu JJ, Connors BW. 1999. Intrinsic firing patterns and whisker-evoked synaptic  
201 responses of neurons in the rat barrel cortex. *J Neurophysiol.* 81:1171-1183.

202

203
